# Supplementary material for: Reconstruction of northeast Asia spring temperature 1784–1990
Source: Copernicus journal article supplement (doi:10.5194/cp-9-261-2013), 2013-01-30
Supplement: Supplementary file 1 [file cp-9-261-2013-supplement.pdf]

## Supplementary Material

**Table S1: Statistics of NFI chronology**

| No. of trees(radii) | Time span | Mean  | SD    | MS    | $\bar{r}_{bt}$ | AC(1) | EPS   |
|---------------------|-----------|-------|-------|-------|----------------|-------|-------|
| 37(74)              | 1784-1990 | 1.005 | 0.329 | 0.197 | 0.306          | 0.598 | 0.869 |

MS, Mean sensitivity; SD, standard deviation;  $\bar{r}_{bt}$ , mean correlation between trees;

AC(1), first-order autocorrelation; EPS, expressed population signal

All values are calculated for the common interval of 1784–1990 using the program ARSTAN (Cook 1985).

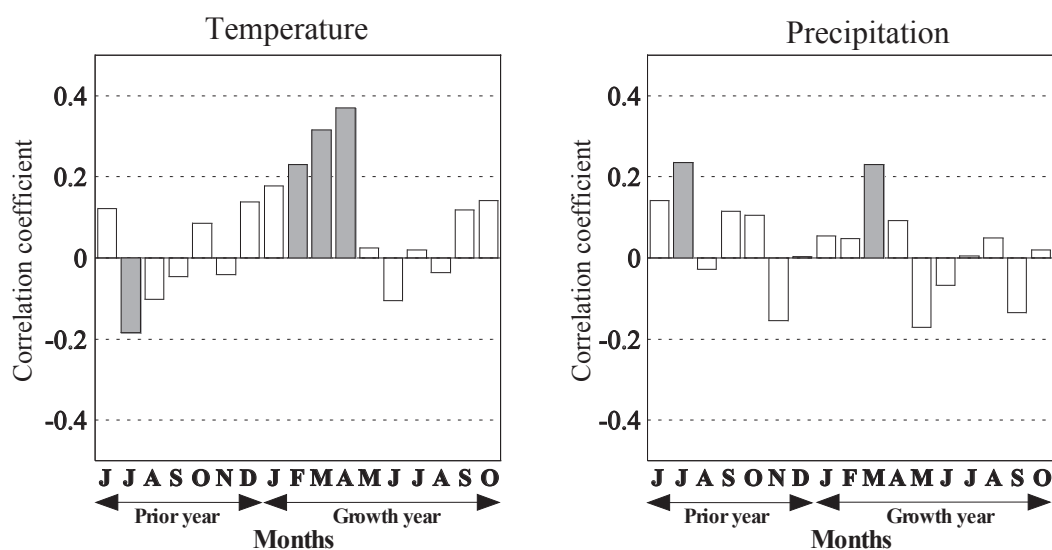

**Figure S1: Simple correlation coefficient between NFI chronology and climatic records** (monthly temperature and total precipitation at the Akita meteorological station, nearest to the forest site) Bars show correlation coefficients. Gray bars mean significant at 95% confidence level.

## Supplementary Material

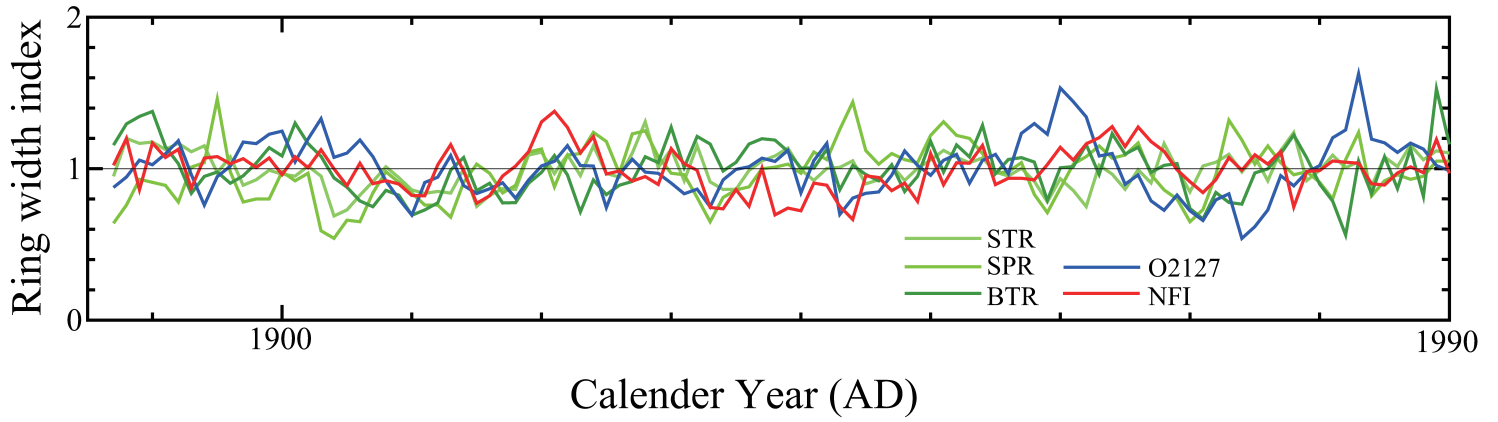

Figure S2: Comparison of five tree-ring chronologies used in this study over calibration period (1887-1990)
